# Supplementary material for: Toward a Disease-Modifying Therapy of Alpha-Synucleinopathies: New Molecules and New Approaches Came into the Limelight
Source: MDPI journal article supplement (doi:10.3390/molecules26237351), 2021-12-03
Supplement: s1 [file s1]

**Table S1.** Summary of some most significant findings and limitations of the key papers/clinical trial announcements in the field of therapeutics against synthesis and extracellular degradation of alpha-synuclein in Parkinson's disease.

| Reference/<br>Clinicaltrial.gov<br>identifier | Compound                                                          | Model used/Study type                                                                                                   | Findings                                                                                                                                                                          | Limitations                                                                                                                                                                      |
|-----------------------------------------------|-------------------------------------------------------------------|-------------------------------------------------------------------------------------------------------------------------|-----------------------------------------------------------------------------------------------------------------------------------------------------------------------------------|----------------------------------------------------------------------------------------------------------------------------------------------------------------------------------|
| <b>Synthesis</b>                              |                                                                   |                                                                                                                         |                                                                                                                                                                                   |                                                                                                                                                                                  |
| Sapru et al. 2006 [35]                        | lentiviral-delivery of shRNA                                      | Human dopaminergic cell line (SH-SY5Y), LV-alpha-synuclein-shRNA-CMV-EGFP vector injected into the striatum of WT rats. | Reduced <i>SNCA</i> mRNA/expression                                                                                                                                               | No quantification of change in alpha-synuclein aggregation, no measure of changes in behavioural deficits                                                                        |
| Lewis et al. 2008 [38]                        | siRNA, shRNA, naked siRNA                                         | <i>Cornu Ammonis</i> (CA1) of the hippocampus of mice                                                                   | Reduced <i>SNCA</i> mRNA/expression                                                                                                                                               | No quantification of change in alpha-synuclein aggregation, no alpha-synuclein aggregation model used therefore no measure of changes in behavioural deficits                    |
| Zharikov et al. 2015 [36]                     | AAV-mediated delivery shRNA                                       | WT rats, rotenone rat model                                                                                             | 35% reduction in alpha-synuclein expression, reduced motor deficits, reduced striatal dopaminergic loss in rotenone rodent model.                                                 | No pharmacokinetic/pharmacodynamic analysis, decrease in TH expression in WT rats                                                                                                |
| Alarcón-Arís et al. 2018 [39]                 | ASO+indatraline IND-1233-ASO                                      | WT mice                                                                                                                 | Lowered expression of endogenous alpha-synuclein mRNA in the brainstem areas/increased dopaminergic and serotonergic signalling without neurodegeneration, Intranasally delivered | No detailed pharmacokinetic/pharmacodynamic analysis, no alpha-synuclein aggregation model used therefore no measure of motor/behavioural deficits                               |
| Pavia-Collado et al. 2021 [41]                | IND-1233-ASO                                                      | A30P/A53T-alpha-synuclein mice (tg)                                                                                     | Reduced alpha-synuclein synthesis in the SNpc and LC, improved DA signalling                                                                                                      | No changes in performance on motor and behaviours batteries                                                                                                                      |
| Uehara et al. 2019 [42]                       | (AmNA)-modified ASO                                               | TH-SNCA-140 m, Thy1-alpha-synuclein mice (tg)                                                                           | Lowered alpha-synuclein mRNA and protein levels, improved motor deficits                                                                                                          | No detailed pharmacokinetic/pharmacodynamic analysis, Intracerebral administration of compound.                                                                                  |
| Spencer et al. 2019 [45]                      | 11aa based upon apoB protein                                      | PDGF-alpha-synuclein mice (tg)                                                                                          | Reduced alpha-synuclein expression and aggregation, decreased neurodegeneration, systemically administered                                                                        | Peptide-based compound have risk of serum peptidases/proteases degradation                                                                                                       |
| McCormack et al. 2010 [37]                    | 21-base pair siRNA duplex against the squirrel monkey <i>SNCA</i> | Squirrel monkey                                                                                                         | Lowering of alpha-synuclein expression by 50% in dopaminergic neurons in SN                                                                                                       | Administered via intracerebral method, no model of alpha-synuclein aggregation used.                                                                                             |
| Cooper et al. 2014 [47]                       | RVG+ siRNA exosome                                                | S129-alpha-synuclein (tg) mice                                                                                          | Decreases alpha-synuclein mRNA                                                                                                                                                    | No measurement of motor/behavioural deficits                                                                                                                                     |
| Schlich et al. 2017 [49]                      | RVG + siRNA liposomes                                             | Mouse primary hippocampal neurons                                                                                       | Decreased alpha-synuclein expression, serum stability                                                                                                                             | No disease relevant rodent model used therefore no motor/behavioural deficits                                                                                                    |
| Xhima et al. 2018 [51]                        | Focused ultrasound+ microbubbles of AVV9 shRNA                    | Human alpha-synuclein expressing rodent model                                                                           | 60% of alpha-synuclein gene expression no change in TH markers                                                                                                                    | No detailed pharmacokinetic/pharmacodynamic analysis, no measure of motor/behavioural deficits, safety concerns surrounding FUS                                                  |
| <b>Active Immunisation</b>                    |                                                                   |                                                                                                                         |                                                                                                                                                                                   |                                                                                                                                                                                  |
| Masliah et al. 2005 [61]                      | Full-length recombinant $\alpha$ -syn expressed in E. Coli        | PDGF-alpha-synuclein mice (tg)                                                                                          | Decreased alpha-synuclein aggregation, increased clearance of alpha-synuclein                                                                                                     | Multiple alpha-synuclein aggregation overexpression models would be preferable, no detailed pharmacokinetic/pharmacodynamic analysis. No measure of motor and cognitive deficits |
| Mandler et al. 2014 [62]                      | PD01A and PD03A                                                   | PDGF-alpha-synuclein and mThy1-alpha-synuclein mice (tg)                                                                | Reduced alpha-synuclein accumulation, neurodegeneration, improved motor deficits with no adverse effects, reduction in physiological alpha-synuclein.                             | Study could further test PD01A and PD03A on non-human primates to increase confidence in drug safety                                                                             |
| NCT02267434                                   | PD03A                                                             | Phase Ib clinical trial in early PD cohort                                                                              | No serious adverse side effects, acceptable immune response against                                                                                                               | n/a                                                                                                                                                                              |

|                                |                                      |                                                                                   |                                                                                                                                                                                              |                                                                                                                        |
|--------------------------------|--------------------------------------|-----------------------------------------------------------------------------------|----------------------------------------------------------------------------------------------------------------------------------------------------------------------------------------------|------------------------------------------------------------------------------------------------------------------------|
|                                |                                      |                                                                                   | the vaccine, cross reactivity against alpha-synuclein targeted epitope                                                                                                                       |                                                                                                                        |
| Volc et al. 2020 [56]          | PD01A                                | Phase Ib clinical trial in early PD cohort (n=32)                                 | PD01A antibodies were observed in CSF, demonstrating successful target engagement, acceptable tolerability and safety                                                                        | n/a                                                                                                                    |
| <b>Passive Immunisation</b>    |                                      |                                                                                   |                                                                                                                                                                                              |                                                                                                                        |
| Masliah et al. 2011 [66]       | monoclonal antibody                  | PDGF-alpha-synuclein mice (tg)                                                    | Reduced alpha-synuclein accumulation and improve motor/cognitive deficits                                                                                                                    | Multiple alpha-synuclein aggregation overexpression models would be preferable                                         |
| Bae et al. 2012 [67]           | 274-antibody                         | PDGF-alpha-synuclein mice (tg)                                                    | Microglial dependent alpha-synuclein clearance and reduced cell-to-cell propagation, improved motor deficits                                                                                 | Multiple alpha-synuclein aggregation overexpression models would be preferable                                         |
| Games et al. 2014 [68]         | 9E4 (PRX002 murine homolog)          | Thy1-alpha-synuclein mice (tg)                                                    | Reduced alpha-synuclein accumulation, reduce neurodegeneration via inhibiting alpha-synuclein truncation, reduced motor and cognitive deficits                                               | Multiple alpha-synuclein aggregation overexpression models would be preferable                                         |
| Schenk et al. 2017 [58]        | PRX002                               | Phase Ia clinical trial                                                           | Acceptable safety and tolerability 95.5% reduction in serum alpha-synuclein                                                                                                                  | n/a                                                                                                                    |
| Jankovic et al. 2018 [59]      | PRX002                               | Phase Ib clinical trial with PD cohort                                            | Acceptable safety and tolerability 95.5% reduction in serum alpha-synuclein and BBB penetrance, dose-dependent rises of PRX002 measurements of CSF.                                          | n/a                                                                                                                    |
| NCT03100149                    | PRX002                               | Phase II clinical trial with an early PD cohort                                   | Active                                                                                                                                                                                       | n/a                                                                                                                    |
| Schofield et al. 2019 [70]     | MEDI1341                             | Unilateral hippocampal alpha-synuclein injection into rats and cynomolgus monkeys | Lowered extracellular alpha-synuclein aggregation                                                                                                                                            | No measure of motor/cognitive deficits                                                                                 |
| NCT03272165                    | MEDI1341                             | Phase Ia clinical trial                                                           | Completed, awaiting results                                                                                                                                                                  | n/a                                                                                                                    |
| NCT04449484                    | MEDI1341                             | Phase Ib clinical trial 36 participants with PD                                   | Recruiting                                                                                                                                                                                   | n/a                                                                                                                    |
| Lindstrom et al. 2014 [77]     | mAb47                                | Thy1-A30P-alpha-synuclein mice (tg)                                               | High specificity towards oligomeric alpha-synuclein protofibrils with the ability to selectively, lower alpha-synuclein protofibrils and reduced motor impairments, no toxic adverse effects | Study could further test mAb47 on non-human primates to increase confidence in drug safety                             |
| NCT04127695                    | ABBV-0805 (formerly BAN0805)         | Phase Ia clinical trial                                                           | Withdrawn for unspecified strategic reasons                                                                                                                                                  | n/a                                                                                                                    |
| El-Agnaf et al. 2017 [80]      | Syn-O1, -O2, and -O4, Syn-F1 and -F2 | Thy1- alpha-synuclein mice (tg)                                                   | Reduced alpha-synuclein accumulation and lowered hippocampal neurodegeneration in                                                                                                            | No measure of motor/cognitive deficits, Multiple alpha-synuclein aggregation overexpression models would be preferable |
| Tran et al. 2014 [96]          | Syn303                               | PFF treated mice                                                                  | Rescue alpha-synuclein propagation and reduce motor deficits, reducing dopaminergic neuronal cell loss                                                                                       | Motor deficit still occurred, further test Syn303 on non-human primates to increase confidence in drug safety          |
| Shahaduzzaman et al. 2015 [74] | N-terminus AB1                       | AAV-WT alpha-synuclein rodent model                                               | Reduced alpha-synuclein in SN, Reduced dopaminergic neuronal cell loss, Reduced motor deficits                                                                                               | Multiple alpha-synuclein aggregation overexpression models would be preferable                                         |
| Weihs et al. 2019 [75]         | BIIB054                              | PFF-injected and AAV-A53T mouse model                                             | Reduce alpha-synuclein accumulation in both models, Reduced loss of DATs in the striatum. improved motor deficits                                                                            | Study could further test BIIB054 on non-human primates to increase confidence in drug safety                           |
| Brys et al. 2019 [60]          | BIIB054                              | Phase Ib clinical trial including both healthy and PD participants                | Safe and tolerable, Drug measured in the CSF (0.2% compared to plasma concentration)                                                                                                         | n/a                                                                                                                    |
| NCT03318523                    | BIIB054                              | Phase II clinical trial                                                           | Active                                                                                                                                                                                       | n/a                                                                                                                    |

**Table S2. Future directions/research priorities**

- New methods of drug delivery to improve blood-brain barrier drug penetrance for post-transcriptional alpha-synuclein strategies.
- An antibody with a high binding affinity for oligomeric alpha-synuclein.
- Investigate the alpha-synuclein strain specificity of immunotherapeutics.
- Clarify if targeting extracellular alpha-synuclein alone will yield a disease-modifying effect in a real-world Parkinson's disease (PD) patient cohorts.
- Establish the therapeutic window for alpha-synuclein knockdown.
- Develop a specific and sensitive biomarker to alpha-synuclein brain accumulation for diagnostic, staging and drug monitoring purposes.
- Form a protocolised and standardized preclinical drug-development pathway for anti alpha-synuclein therapeutics.
- Define what difference in MDS-UPDRS change from baseline is required before a disease-modifying effect can be confirmed.
- Identify responder subgroups within a treatment group in the forthcoming Phase II clinical trials.
- Develop strategies to enhance the selection of clinical trial sporadic PD cohorts, potentially based on alpha-synuclein pathology related biomarkers.
- Consider the utility of anti alpha-synuclein therapeutics in a prodromal PD cohort.
